# Supplementary material for: Extratropical cyclones drive the spatial heterogeneity distribution of Sea Salt Aerosol (SSA) and vertical transport in the Southern Ocean
Source: Copernicus journal article supplement (doi:10.5194/egusphere-2025-3987), 2025-09-03
Supplement: Supplementary file 1 [file egusphere-2025-3987-supplement.pdf]

# **Supplement of Extratropical cyclones drive the spatial heterogeneity distribution of Sea Salt Aerosol (SSA) and vertical transport in the Southern Ocean**

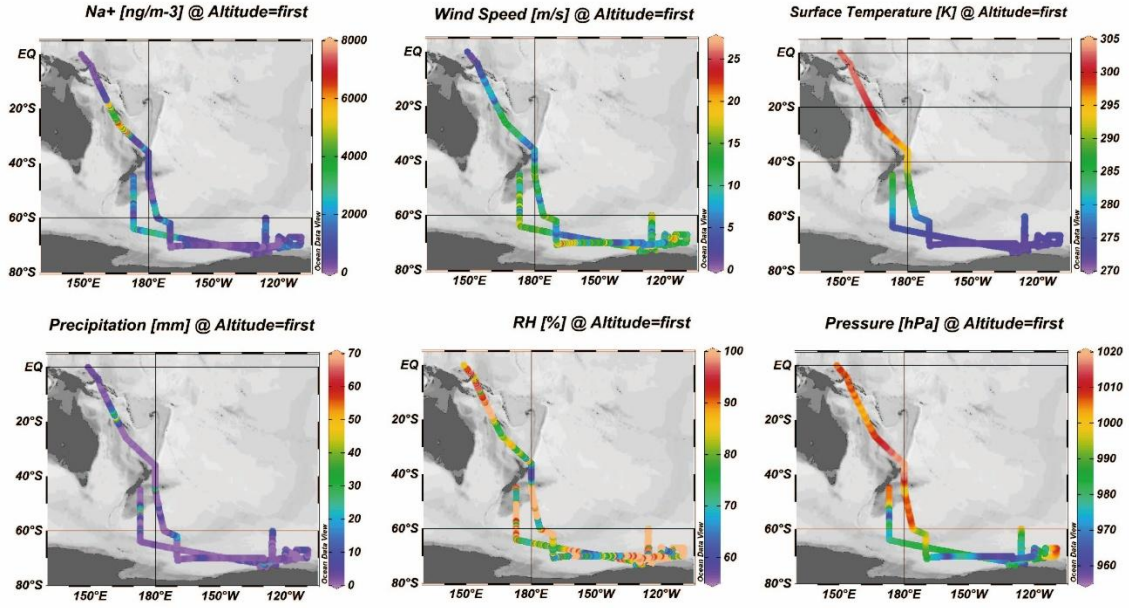

**Fig. S1 Temporal distribution of Na<sup>+</sup> and related meteorological parameters in the route of  
the 34th Chinese Antarctic scientific research vessel.**

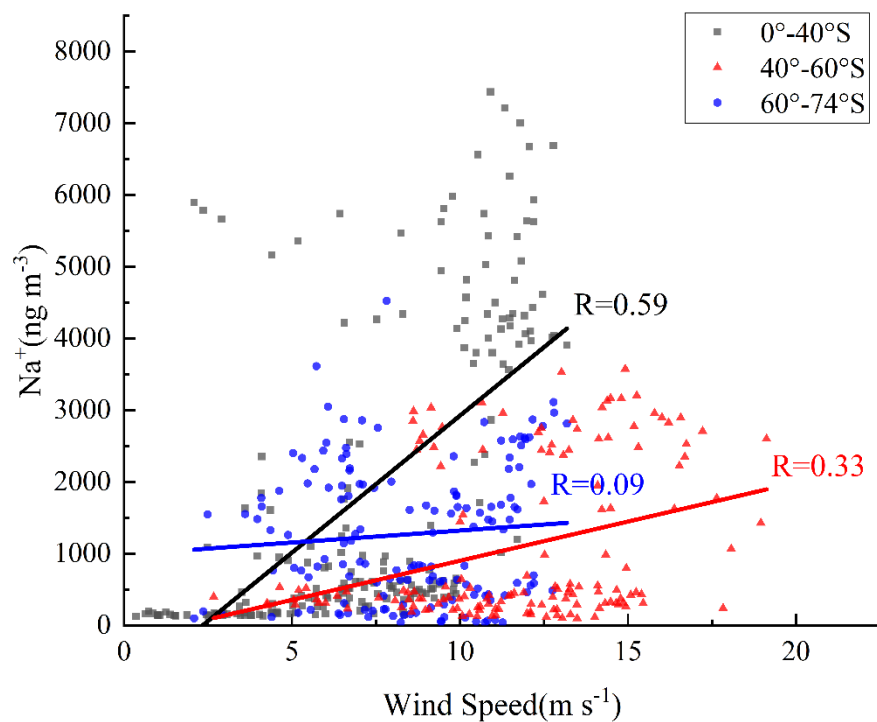

**Fig. S2 Correlation between  $\text{Na}^+$  and wind speed in regions of different latitude.**

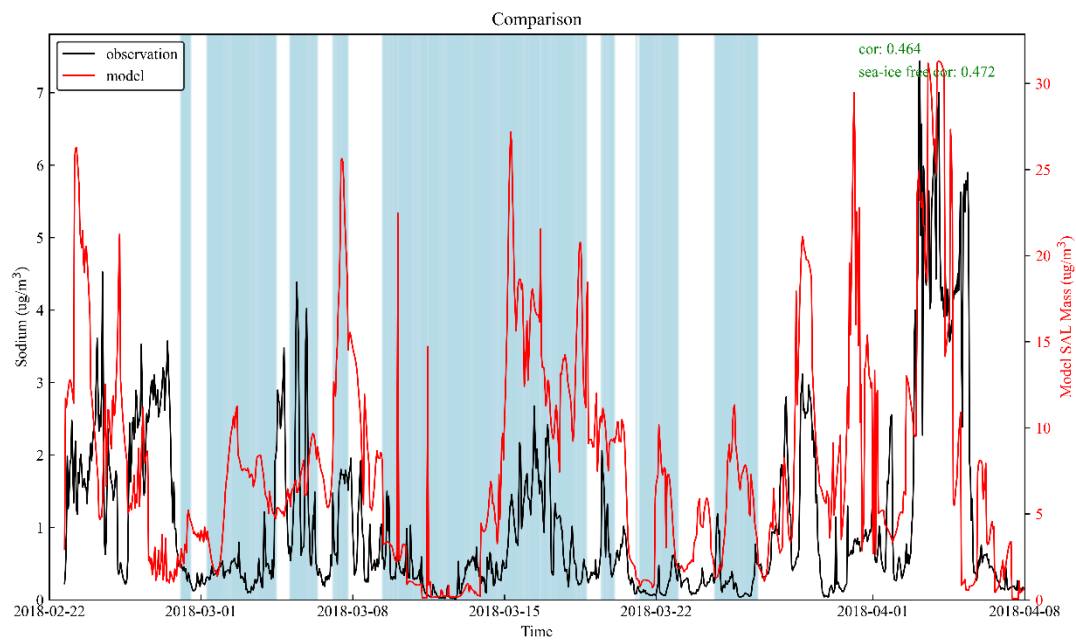

**Fig. S3 The correlation between SSA mass concentrations simulated GEOS-Chem-APM model and  $\text{Na}^+$  mass concentrations observed during the cruise.**

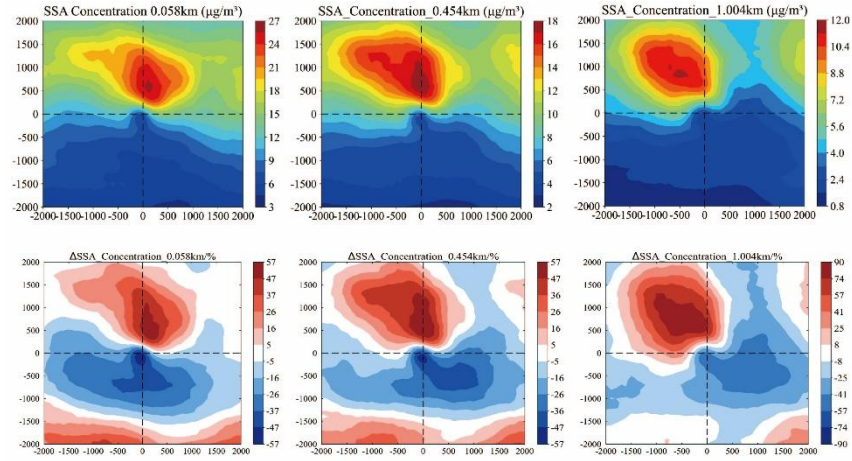

**Fig. S4 ETCs composites of SSA mass concentrations at different altitude layers and anomalies relative to background.**

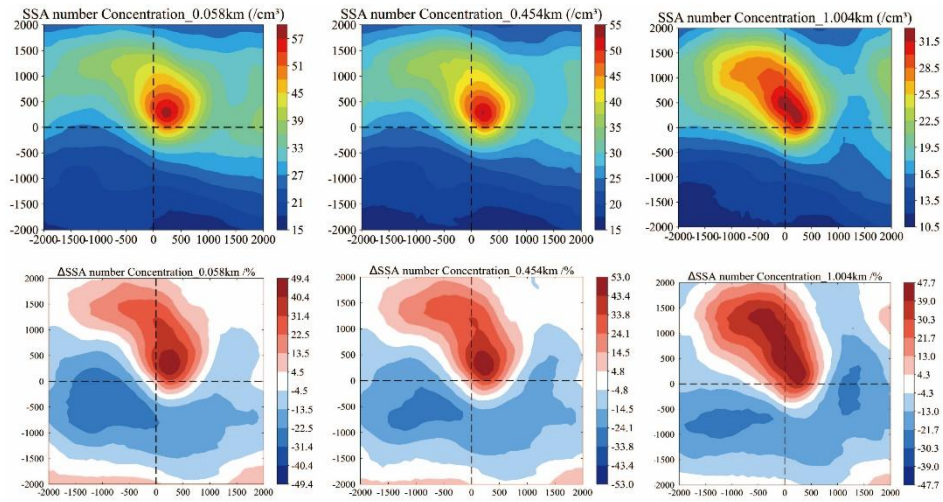

**Fig. S5 ETCs composites of SSA number concentrations at different altitude layers and anomalies relative to background.**

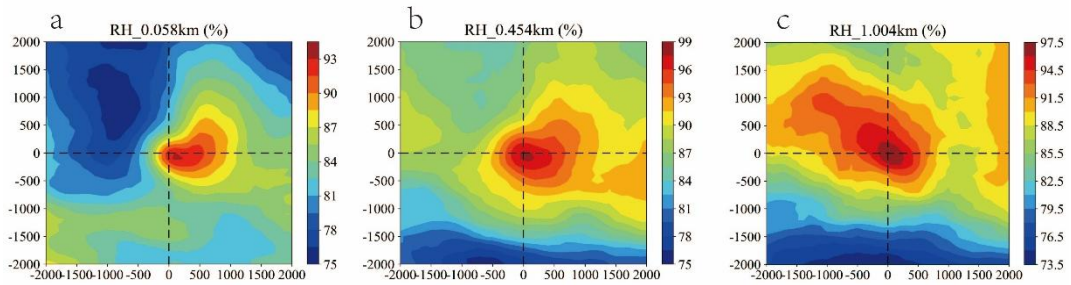

**Fig. S6 The composites analysis of RH at different altitudes.**

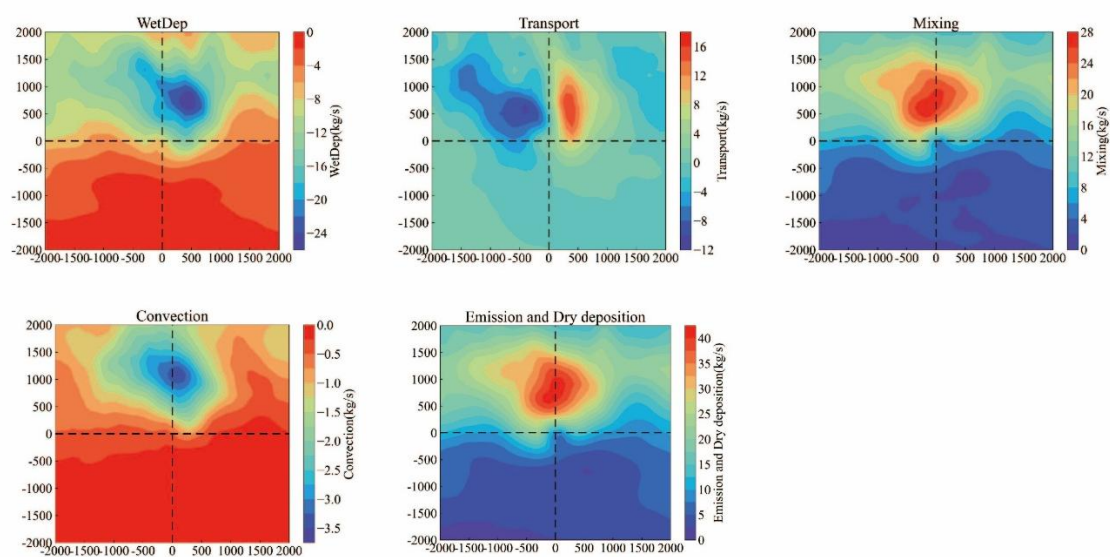

**Fig. S7 The composites analysis of various physicochemical processes.**
